# Supplementary material for: Effects of Varieties, Cultivation Methods, and Origins of Citrus sinensis ‘hongjiang’ on Volatile Organic Compounds: HS-SPME-GC/MS Analysis Coupled with OPLS-DA
Source: MDPI journal article supplement (doi:10.3390/agriculture12101725), 2022-10-19
Supplement: s1 [file s1]

# **Effects of Varieties, Cultivation Methods, and Origins of *Citrus sinensis* ‘hongjiang’ on Volatile Organic Compounds: HS-SPME-GC/MS Analysis Coupled with OPLS-DA**

**Xiangwu Huang <sup>1,†</sup>, Lihong Zhao <sup>1,†</sup>, Sheng Pang <sup>1</sup>, Yijun Liu <sup>2,3,\*</sup>, Jianrong Liu <sup>1</sup> and Meiqian Zhang <sup>1</sup>**

<sup>1</sup> Guangdong Zhanjiang Agricultural Reclamation Scientific Research Institute, Zhanjiang 524086, China

<sup>2</sup> Hainan Key Laboratory of Storage & Processing of Fruits and Vegetables, Agricultural Products Processing Research Institute, Chinese Academy of Tropical Agricultural Sciences, Zhanjiang 524001, China

<sup>3</sup> Key Laboratory of Tropical Crop Products Processing of the Ministry of Agriculture and Rural Affairs, Zhanjiang 524001, China

\* Correspondence: liuyijun-1@163.com; Tel.: +86-759-2221090; Fax: +86-759-2208758

† These authors contributed equally to this work.

**Table S1. The composition and relative contents of volatile organic compounds (VOCs) among *Citrus sinensis* “hongjiang”**

| No | Retention time | Name                                            | CAS#       | Molecular formula                              | CAS # | Retention Index |                                |
|----|----------------|-------------------------------------------------|------------|------------------------------------------------|-------|-----------------|--------------------------------|
|    |                |                                                 |            |                                                |       | Calculated RIs  | Literature values <sup>a</sup> |
| 1  | 5.684          | Hexanal                                         | 66-25-1    | C <sub>6</sub> H <sub>12</sub> O               | 100   | 803             | 801                            |
| 2  | 5.79           | ethyl butanoate                                 | 105-54-4   | C <sub>6</sub> H <sub>12</sub> O <sub>2</sub>  | 116   | 784             | 785                            |
| 3  | 7.593          | Hex-2-enal                                      | 505-57-7   | C <sub>6</sub> H <sub>10</sub> O               | 98    | 813             | 814                            |
| 4  | 7.772          | Hex-3-en-1-ol                                   | 928-96-1   | C <sub>6</sub> H <sub>12</sub> O               | 100   | 866             | 868                            |
| 5  | 8.316          | Hexan-1-ol                                      | 111-27-3   | C <sub>6</sub> H <sub>14</sub> O               | 102   | 859             | 860                            |
| 6  | 9.684          | Heptanal                                        | 111-71-7   | C <sub>7</sub> H <sub>14</sub> O               | 114   | 906             | 905                            |
| 7  | 10.79          | $\alpha$ -Thujene                               | 353-31-3   | C <sub>10</sub> H <sub>16</sub>                | 136   | 924             | 927                            |
| 8  | 11.053         | $\alpha$ -Pinene                                | 80-56-8    | C <sub>10</sub> H <sub>16</sub>                | 136   | 945             | 948                            |
| 9  | 13.038         | Sabinene                                        | 3387-41-5  | C <sub>10</sub> H <sub>16</sub>                | 136   | 896             | 897                            |
| 10 | 14.037         | $\beta$ -Myrcene                                | 123-35-3   | C <sub>10</sub> H <sub>16</sub>                | 136   | 963             | 958                            |
| 11 | 14.627         | Octanal                                         | 124-13-0   | C <sub>8</sub> H <sub>16</sub> O               | 128   | 1002            | 1005                           |
| 12 | 14.863         | Car-3-ene                                       | 13466-78-9 | C <sub>10</sub> H <sub>16</sub>                | 136   | 945             | 948                            |
| 13 | 15.254         | $\alpha$ -Terpinene                             | 99-86-5    | C <sub>10</sub> H <sub>16</sub>                | 136   | 1014            | 1018                           |
| 14 | 16.582         | Limonene                                        | 138-86-3   | C <sub>10</sub> H <sub>16</sub>                | 136   | 1026            | 1030                           |
| 15 | 17.061         | $\beta$ -Ocimene                                | 13877-91-3 | C <sub>10</sub> H <sub>16</sub>                | 136   | 954             | 976                            |
| 16 | 17.498         | $\gamma$ -Terpinene                             | 99-85-4    | C <sub>10</sub> H <sub>16</sub>                | 136   | 967             | 998                            |
| 17 | 18.02          | 2-Octen-1-ol                                    | 18409-17-1 | C <sub>8</sub> H <sub>16</sub> O               | 128   | 1064            | 1067                           |
| 18 | 18.176         | 1-Octanol                                       | 111-87-5   | C <sub>8</sub> H <sub>18</sub> O               | 130   | 1058            | 1059                           |
| 19 | 18.36          | 7-methyloct-3-yne                               | 37050-06-9 | C <sub>9</sub> H <sub>16</sub>                 | 124   | 858             | 869                            |
| 20 | 18.845         | $\alpha$ -Terpinolene                           | 586-62-9   | C <sub>10</sub> H <sub>16</sub>                | 136   | 1043            | 1052                           |
| 21 | 19.657         | Linalool                                        | 78-70-6    | C <sub>10</sub> H <sub>18</sub> O              | 154   | 1085            | 1082                           |
| 22 | 19.833         | 1-Nonanal                                       | 124-19-6   | C <sub>9</sub> H <sub>18</sub> O               | 142   | 1107            | 1104                           |
| 23 | 20.123         | <i>p</i> -Mentha-1,5,8-triene                   | 21195-59-5 | C <sub>10</sub> H <sub>14</sub>                | 134   | 1032            | 1029                           |
| 24 | 20.454         | 4,8-Dimethylnona-1,3,7-triene                   | 19945-61-0 | C <sub>11</sub> H <sub>18</sub>                | 150   | 1115            | 1113                           |
| 25 | 20.58          | 1-methyl-4-(1-methylethenyl)-2-Cyclohexene-1-ol | 7212-40-0  | C <sub>10</sub> H <sub>16</sub> O              | 152   | 1153            | 1140                           |
| 26 | 21.044         | Ethyl 3-hydroxyhexanoate                        | 2305-25-1  | C <sub>8</sub> H <sub>16</sub> O <sub>3</sub>  | 160   | 1126            | 1129                           |
| 27 | 21.087         | 4-Acetyl-1-methylcyclohexene                    | 1530-61-2  | C <sub>9</sub> H <sub>14</sub> O               | 138   | 1092            | 1088                           |
| 28 | 21.301         | <i>cis-p</i> -Mentha-2,8-dien-1-ol              | 3886-78-0  | C <sub>10</sub> H <sub>16</sub> O              | 152   | 1142            | 1140                           |
| 29 | 22.281         | Citronellal                                     | 106-23-0   | C <sub>10</sub> H <sub>18</sub> O              | 154   | 1130            | 1125                           |
| 30 | 22.579         | 6-Nonenal                                       | 2277-19-2  | C <sub>9</sub> H <sub>16</sub> O               | 140   | 1116            | 1112                           |
| 31 | 22.59          | 2-Nonenal                                       | 18829-56-6 | C <sub>9</sub> H <sub>16</sub> O               | 140   | 1175            | 1163                           |
| 32 | 23.096         | 2-None-1-ol                                     | 31502-14-4 | C <sub>9</sub> H <sub>18</sub> O               | 142   | 1164            | 1167                           |
| 33 | 23.233         | nonan-1-ol                                      | 143-08-8   | C <sub>9</sub> H <sub>20</sub> O               | 144   | 1160            | 1159                           |
| 34 | 23.402         | 4-methyl-1-(1-methylethyl)-3-Cyclohexen-1-ol    | 562-74-3   | C <sub>10</sub> H <sub>18</sub> O              | 154   | 1193            | 1195                           |
| 35 | 23.59          | Octanoic acid                                   | 124-07-2   | C <sub>8</sub> H <sub>16</sub> O <sub>2</sub>  | 144   | 1185            | 1183                           |
| 36 | 23.78          | Isogeranial                                     | 55722-59-3 | C <sub>10</sub> H <sub>16</sub> O              | 152   | 1173            | 1179                           |
| 37 | 23.852         | Cryptone                                        | 500-02-7   | C <sub>9</sub> H <sub>14</sub> O               | 138   | 1194            | 1187                           |
| 38 | 24.092         | $\alpha$ -Terpineol                             | 98-55-5    | C <sub>10</sub> H <sub>18</sub> O              | 154   | 1198            | 1195                           |
| 39 | 24.573         | Ethyl octanoate                                 | 106-32-1   | C <sub>10</sub> H <sub>20</sub> O <sub>2</sub> | 172   | 1184            | 1183                           |
| 40 | 24.779         | 2-methyl-5-(1-methylethenyl)-Cyclohexanone      | 1478-60-2  | C <sub>10</sub> H <sub>16</sub> O              | 152   | 1192            | 1179                           |
| 41 | 24.909         | Decanal                                         | 112-31-2   | C <sub>10</sub> H <sub>20</sub> O              | 156   | 1206            | 1204                           |
| 42 | 25.276         | 2,4-Dodecadienal                                | 21662-16-8 | C <sub>12</sub> H <sub>20</sub> O              | 180   | 1423            | 1418                           |

|    |        |                                                                      |             |          |     |      |      |
|----|--------|----------------------------------------------------------------------|-------------|----------|-----|------|------|
| 43 | 25.283 | 2,4-Nonadienal                                                       | 1771-49-0   | C9H14O   | 138 | 1125 | 1120 |
| 44 | 25.533 | Carveol                                                              | 1197-07-5   | C10H16O  | 152 | 1222 | 1206 |
| 45 | 26.056 | $\beta$ -Citronellol                                                 | 106-22-9    | C10H20O  | 156 | 1224 | 1179 |
| 46 | 26.626 | Z-Citral                                                             | 106-26-3    | C10H16O  | 152 | 1176 | 1174 |
| 47 | 26.707 | Carvone                                                              | 6485-40-1   | C10H14O  | 150 | 1121 | 1190 |
| 48 | 27.299 | Geraniol                                                             | 106-24-1    | C10H18O  | 154 | 1236 | 1228 |
| 49 | 27.611 | 7-methoxy-3,7-dimethyl-Octanal                                       | 3613-30-7   | C11H22O2 | 186 | 1233 | 1230 |
| 50 | 28.078 | 3,7-dimethyl-2,6-Octadienal                                          | 141-27-5    | C10H16O  | 152 | 1175 | 1174 |
| 51 | 28.961 | <i>p</i> -Mentha-1(7),8(10)-dien-9-ol                                | 29548-13-8  | C10H16O  | 152 | 1260 | 1256 |
| 52 | 29.111 | 2,4-Decadienal                                                       | 25152-83-4  | C10H16O  | 152 | 1233 | 1220 |
| 53 | 29.768 | Undecanal                                                            | 112-44-7    | C11H22O  | 170 | 1314 | 1309 |
| 54 | 30.592 | Methyl geranate                                                      | 1189-09-9   | C11H18O2 | 182 | 1330 | 1320 |
| 55 | 31.246 | 1-methyl-4-(1-methylethenyl)-1,2-Cyclohexanediol                     | 1946-00-5   | C10H18O2 | 170 | 1355 | 1346 |
| 56 | 31.702 | $\alpha$ -Copaene                                                    | 138874-68-7 | C15H24   | 204 | 1380 | 1375 |
| 57 | 31.941 | Citronellyl acetate                                                  | 150-84-5    | C12H22O2 | 198 | 1374 | 1350 |
| 58 | 32.382 | 2-Undecenal                                                          | 2463-77-6   | C11H20O  | 168 | 1311 | 1311 |
| 59 | 32.385 | 8-undecen-1-al                                                       | 147159-49-7 | C11H20O  | 168 | 1373 | 1365 |
| 60 | 32.434 | Neryl acetate                                                        | 141-12-8    | C12H20O2 | 196 | 1352 | 1352 |
| 61 | 32.62  | <i>n</i> -Decanoic acid                                              | 334-48-5    | C10H20O2 |     | 1374 | 1372 |
| 62 | 33.655 | $\beta$ -Element                                                     | 515-13-9    | C15H24   | 204 | 1398 | 1398 |
| 63 | 33.88  | Ethyl decanoate                                                      | 110-38-3    | C12H24O2 | 200 | 1340 | 1399 |
| 64 | 34.403 | Dodecanal                                                            | 112-54-9    | C12H24O  | 184 | 1345 | 1402 |
| 65 | 34.845 | <i>trans</i> -Caryophyllene                                          | 87-44-5     | C15H24   | 204 | 1496 | 1494 |
| 66 | 34.875 | Caryophyllene                                                        | 13877-93-5  | C15H24   | 204 | 1425 | 1424 |
| 67 | 35.285 | Germacrene D                                                         | 23986-74-5  | C15H24   | 204 | 1217 | 1216 |
| 68 | 35.913 | 1,2,3,5,6,7,8,8a-octahydro-1,4-dimethyl-7-(1-methylethenyl)-azulene  | 3691-11-0   | C15H24   | 204 | 1451 | 1490 |
| 69 | 36.22  | decahydro-1,1,7-trimethyl-4-methylene-1H-Cycloprop-azulene           | 25246-27-9  | C15H24   | 204 | 1387 | 1386 |
| 70 | 36.377 | 6,10-dimethyl-5,9-Undecadien-2-one                                   | 689-67-8    | C13H22O  | 194 | 1422 | 1420 |
| 71 | 36.382 | linalyl acetate                                                      | 115-95-7    | C12H20O2 | 196 | 1276 | 1272 |
| 72 | 36.581 | Farnesene                                                            | 18794-84-8  | C15H24   | 204 | 1451 | 1440 |
| 73 | 36.869 | Eremophila-1(10),8,11-triene                                         | 190327-38-9 | C15H22   | 202 | 1508 | 1507 |
| 74 | 36.875 | Farnesene epoxide                                                    | 83637-40-5  | C15H24O  | 220 | 1542 | 1540 |
| 75 | 36.901 | 8-Cedren-13-ol                                                       | 18319-35-2  | C15H24O  | 220 | 1647 | 1646 |
| 76 | 37.036 | 4a-dimethyl-6-(prop-1-en-2-yl)-1,2,3,4,4a,5,6,7-octahydronaphthalene | 823810-22-6 | C15H24   | 204 | 1475 | 1473 |
| 77 | 37.294 | $\alpha$ -selinene                                                   | 473-13-2    | C15H24   | 204 | 1478 | 1474 |
| 78 | 37.715 | Selina-4,11-diene                                                    | 17627-30-4  | C15H24   | 204 | 1479 | 1476 |
| 79 | 37.732 | decahydro-1,1,3a-trimethyl-7-methylene-1H-Cyclopropa-naphthalene     | 20071-49-2  | C15H24   | 204 | 1489 | 1398 |
| 80 | 38.445 | Valencene                                                            | 997-29-7    | C15H24   | 204 | 1578 | 1474 |
| 81 | 38.63  | $\alpha$ -Bulnesene                                                  | 489-81-6    | C15H24   | 204 | 1506 | 1505 |
| 82 | 39.188 | $\alpha$ -Panasinsen                                                 | 56633-28-4  | C15H24   | 204 | 1418 | 1416 |
| 83 | 39.369 | $\delta$ -Cadinene                                                   | 483-76-1    | C15H24   | 204 | 1522 | 1518 |

|     |        |                                                                  |             |          |     |      |      |
|-----|--------|------------------------------------------------------------------|-------------|----------|-----|------|------|
| 84  | 39.739 | 11-Tridecyn-1-ol                                                 | 33925-75-6  | C13H24O  | 196 | 1576 | 1574 |
| 85  | 40.984 | Nerolidol                                                        | 40716-66-3  | C15H26O  | 222 | 1568 | 1561 |
| 86  | 42.268 | Diethyl phthalate                                                | 84-66-2     | C12H14O4 | 222 | 1594 | 1592 |
| 87  | 42.834 | Caryophyllene oxide                                              | 1139-30-6   | C15H24O  | 220 | 1589 | 1587 |
| 88  | 42.995 | Neointermedeol                                                   | 5945-72-2   | C15H26O  | 222 | 1688 | 1668 |
| 89  | 43.22  | 13-nor-Eremophil-1(10)-en-11-one                                 | 54275-21-7  | C14H22O  | 206 | 1592 | 1581 |
| 90  | 43.246 | Labdadienedial                                                   | 104263-85-6 | C20H30O2 | 302 | 1591 | 1490 |
| 91  | 43.605 | cadin-4-en-1 $\beta$ -ol                                         | 73365-77-2  | C15H26O  | 222 | 1616 | 1614 |
| 92  | 43.616 | Himbaccol                                                        | 552-02-3    | C15H26O  | 222 | 1535 | 1530 |
| 93  | 43.998 | 11,11-dimethyl-, 4,8-bis(methylene)-Bicyclo [7.2.0] undecan-3-ol | 79580-01-1  | C15H24O  | 220 | 1647 | 1636 |
| 94  | 44.216 | Viridiflorol                                                     | 19078-39-8  | C15H26O  | 222 | 1598 | 1594 |
| 95  | 44.791 | Intermedeol                                                      | 6168-59-8   | C15H26O  | 222 | 1670 | 1668 |
| 96  | 46.065 | decahydro-1,5,5,8a-tetramethyl-1,4-Methanoazulen-9-one           | 465-26-9    | C15H24O  | 220 | 1579 | 1576 |
| 97  | 48.299 | 1,5-diethenyl-2,3-dimethyl-Cyclohexane                           | 68779-12-4  | C12H20   | 164 | 1145 | 1143 |
| 98  | 48.65  | $\alpha$ -Cyperone                                               | 473-08-5    | C15H22O  | 218 | 1674 | 1673 |
| 99  | 50.272 | Nootkatone                                                       | 91416-23-8  | C15H22O  | 218 | 1837 | 1834 |
| 100 | 50.55  | Solavetivone                                                     | 54878-25-0  | C15H22O  | 218 | 1746 | 1645 |
| 101 | 51.085 | geranylgeranyl acetate                                           | 61691-98-3  | C22H36O2 | 332 | 2319 | 2316 |
| 102 | 51.638 | Corymbolone                                                      | 97094-19-4  | C15H24O2 | 236 | 1788 | 1785 |

a. the data were from NIST Chemical Structures Library (USA Database of Standards Institute, 2014 edition), Wiley Library (William Atlas Library, 9th edition).

**Table S2.** the differences in VOCs in 'hongjiang' obtained from different factors were analyzed by

VIP analysis and heat map analysis in OPLS-DA

| No | VIP value | No | VIP value | No  | VIP value |
|----|-----------|----|-----------|-----|-----------|
| 1  | 0.959186  | 35 | 1.20053   | 69  | 0.707304  |
| 2  | 0.990339  | 36 | 1.07735   | 70  | 1.01253   |
| 3  | 0.943815  | 37 | 1.17301   | 71  | 1.11464   |
| 4  | 1.1721    | 38 | 0.958761  | 72  | 1.01737   |
| 5  | 1.02816   | 39 | 1.05897   | 73  | 1.08372   |
| 6  | 0.717722  | 40 | 1.05021   | 74  | 1.11093   |
| 7  | 1.17921   | 41 | 1.03707   | 75  | 1.18045   |
| 8  | 0.919489  | 42 | 1.25436   | 76  | 1.08912   |
| 9  | 0.925623  | 43 | 1.05368   | 77  | 0.907922  |
| 10 | 0.90578   | 44 | 0.917137  | 78  | 0.983413  |
| 11 | 1.00441   | 45 | 1.07168   | 79  | 1.13552   |
| 12 | 0.777899  | 46 | 1.18342   | 80  | 0.97246   |
| 13 | 1.10488   | 47 | 1.00776   | 81  | 0.924352  |
| 14 | 0.890596  | 48 | 1.03303   | 82  | 0.916278  |
| 15 | 0.434662  | 49 | 1.16439   | 83  | 1.01064   |
| 16 | 0.951232  | 50 | 1.1993    | 84  | 0.742262  |
| 17 | 1.09365   | 51 | 0.95244   | 85  | 0.946582  |
| 18 | 0.918413  | 52 | 0.950733  | 86  | 0.859058  |
| 19 | 1.17095   | 53 | 0.743983  | 87  | 0.771121  |
| 20 | 1.17351   | 54 | 1.00333   | 88  | 0.844081  |
| 21 | 0.933587  | 55 | 1.09626   | 89  | 0.929089  |
| 22 | 1.03961   | 56 | 0.971896  | 90  | 1.09131   |
| 23 | 0.977287  | 57 | 1.07311   | 91  | 1.06074   |
| 24 | 0.841294  | 58 | 1.00257   | 92  | 1.03756   |
| 25 | 1.02435   | 59 | 0.970501  | 93  | 0.904177  |
| 26 | 1.06594   | 60 | 1.03263   | 94  | 0.918559  |
| 27 | 1.00836   | 61 | 0.960167  | 95  | 0.989988  |
| 28 | 1.17296   | 62 | 0.914333  | 96  | 0.924141  |
| 29 | 1.0793    | 63 | 0.963771  | 97  | 1.07991   |
| 30 | 0.72771   | 64 | 0.871637  | 98  | 0.812826  |
| 31 | 0.645616  | 65 | 1.12163   | 99  | 0.874442  |
| 32 | 1.11097   | 66 | 1.03231   | 100 | 0.902154  |
| 33 | 0.969324  | 67 | 1.24131   | 101 | 1.18013   |
| 34 | 0.937454  | 68 | 0.95051   | 102 | 0.929052  |

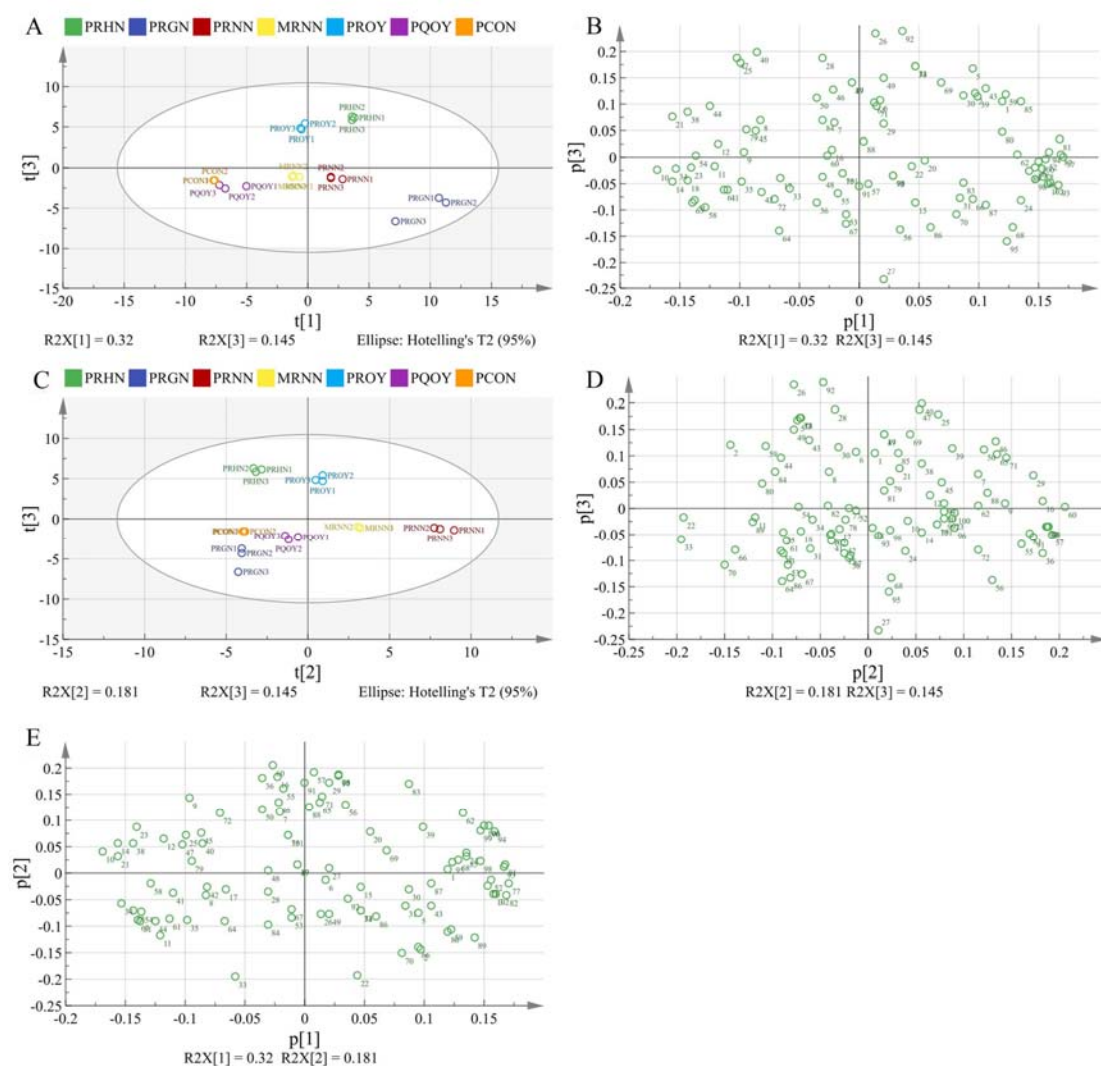

**Figure S1.** Scores plot of PC1/PC3 (A) and PC2/PC3 (C), loading plot of PC1/PC2 (E), PC1/PC3 (B) and PC2/PC3 (D) for VOCs among *Citrus sinensis*. 'hongjiang'.
